# Supplementary material for: Mice Microbiota Composition Changes by Inulin Feeding with a Long Fasting Period under a Two-Meals-Per-Day Schedule
Source: PubMed Central journal article supplement (PMC6893728; doi:10.3390/nu11112802), 2019-11-16
Supplement: nutrients-11-02802-s001.pdf [file nutrients-11-02802-s001.pdf]

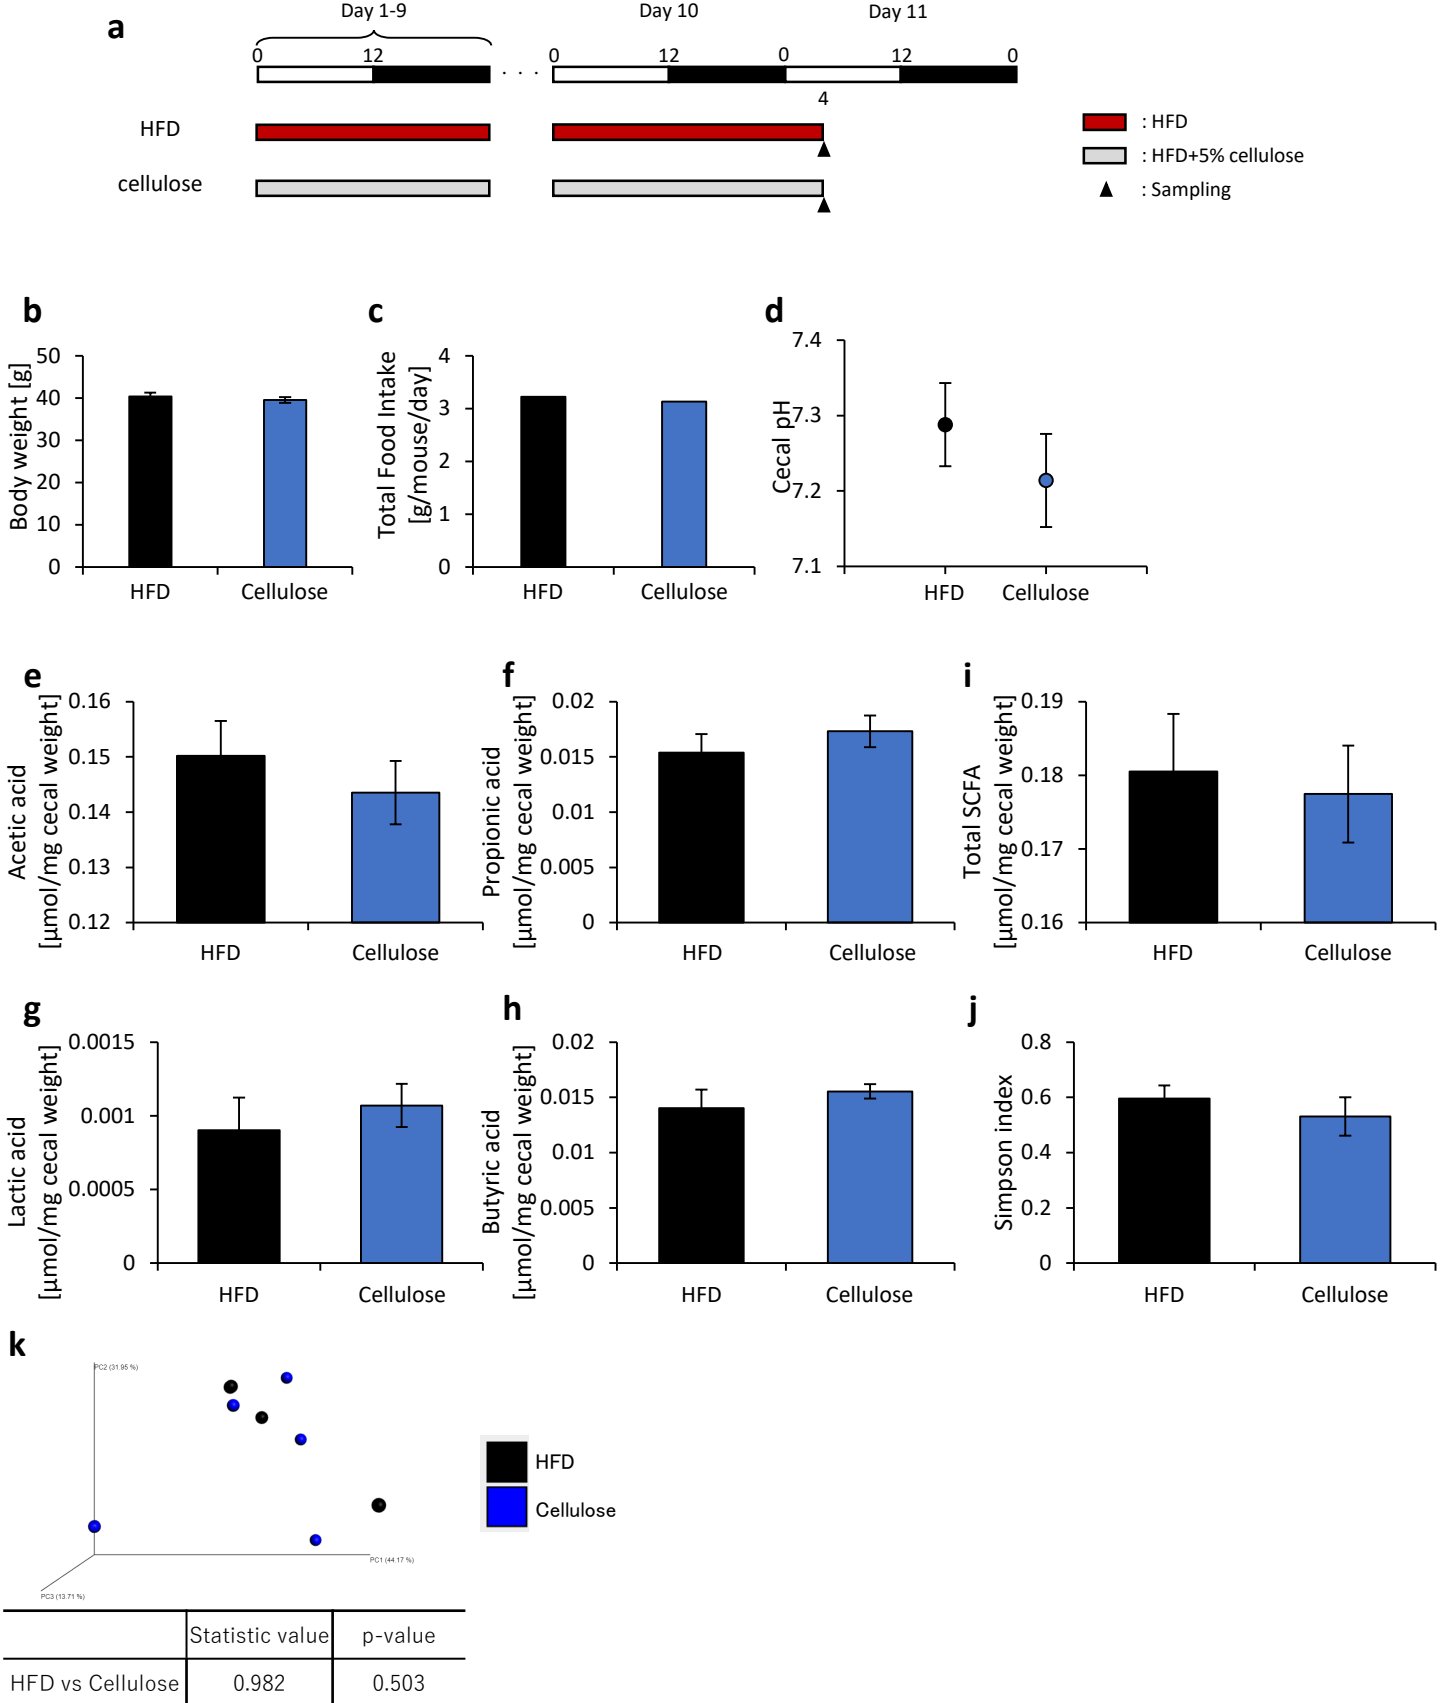

**Figure S1**

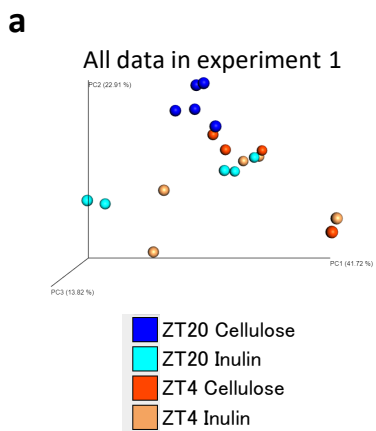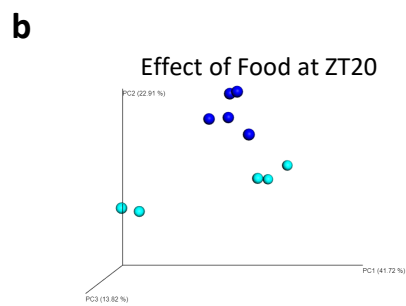

|                     | Statistic value | p-value |
|---------------------|-----------------|---------|
| Cellulose vs inulin | 3.439           | 0.005   |

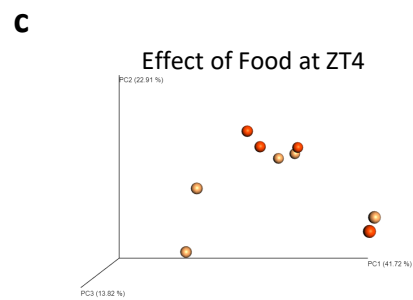

|                     | Statistic value | p-value |
|---------------------|-----------------|---------|
| Cellulose vs inulin | 0.706           | 0.648   |

**a**

All data in experiment 2

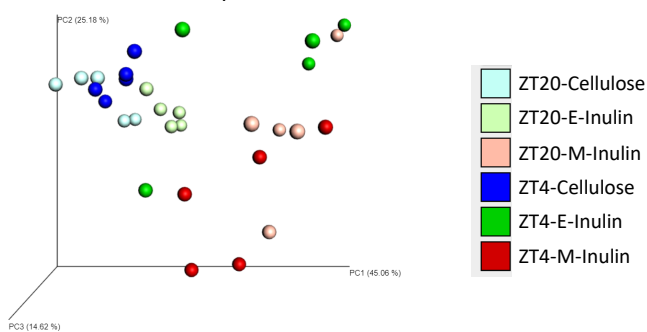**b** At ZT20

Cellulose vs M-inulin

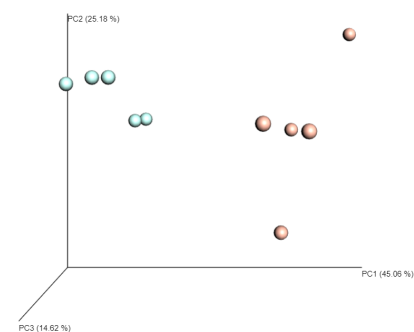

Statistic value p-value

|                       |       |       |
|-----------------------|-------|-------|
| Cellulose vs M-inulin | 10.96 | 0.010 |
|-----------------------|-------|-------|

Cellulose vs E-inulin

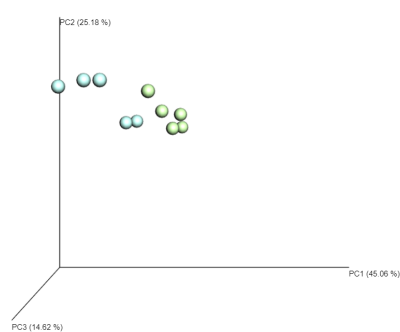

Statistic value p-value

|                       |       |       |
|-----------------------|-------|-------|
| Cellulose vs E-inulin | 4.051 | 0.057 |
|-----------------------|-------|-------|

M-inulin vs E-inulin

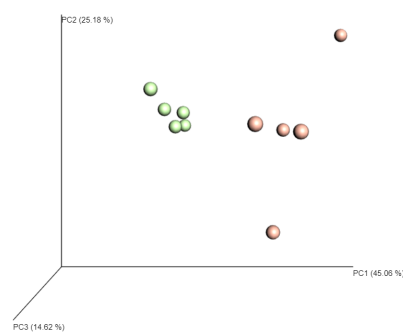

Statistic value p-value

|                      |       |       |
|----------------------|-------|-------|
| M-inulin vs E-inulin | 5.774 | 0.009 |
|----------------------|-------|-------|

**c** At ZT4

Cellulose vs M-inulin

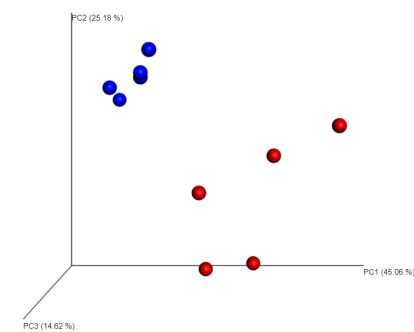

Statistic value p-value

|                       |       |       |
|-----------------------|-------|-------|
| Cellulose vs M-inulin | 12.92 | 0.009 |
|-----------------------|-------|-------|

Cellulose vs E-inulin

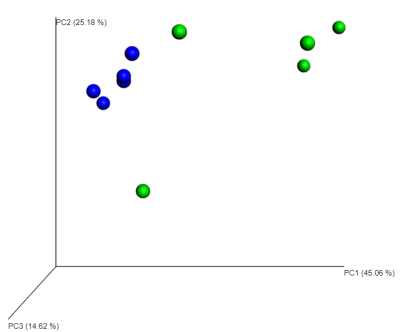

Statistic value p-value

|                       |       |       |
|-----------------------|-------|-------|
| Cellulose vs E-inulin | 5.258 | 0.036 |
|-----------------------|-------|-------|

M-inulin vs E-inulin

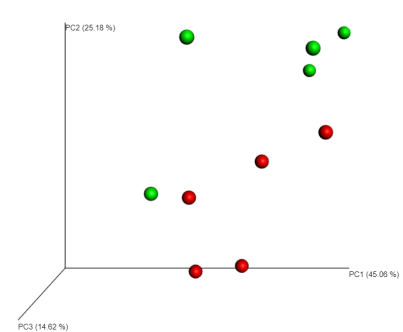

Statistic value p-value

|                      |       |       |
|----------------------|-------|-------|
| M-inulin vs E-inulin | 3.384 | 0.049 |
|----------------------|-------|-------|

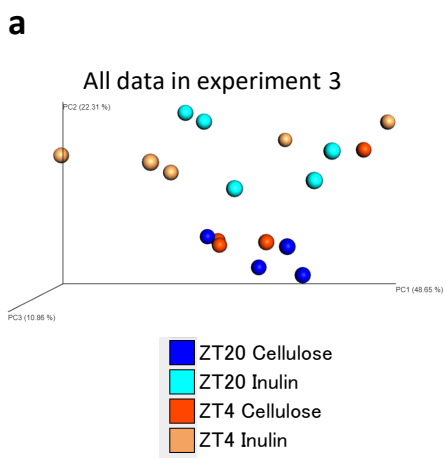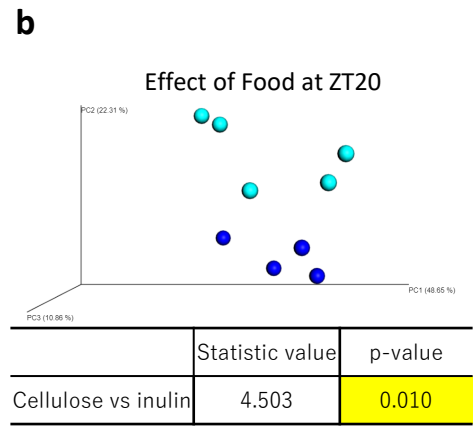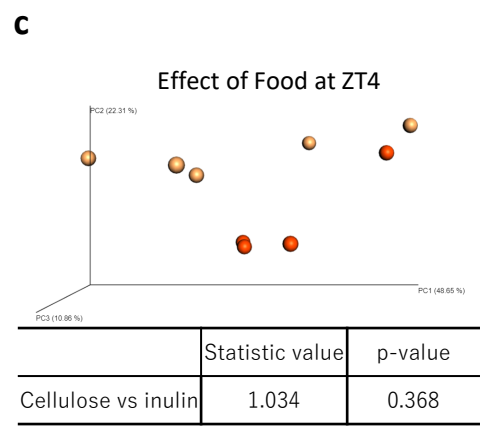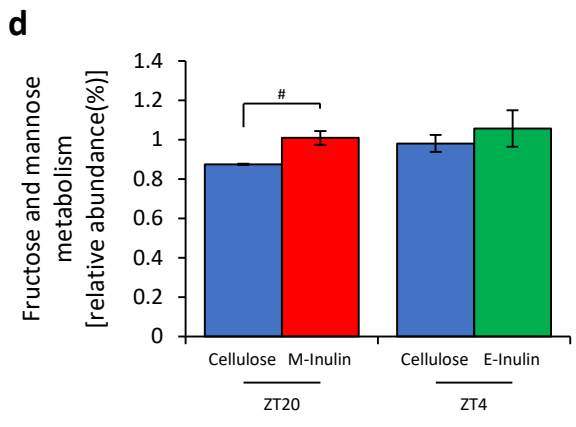

Figure S4

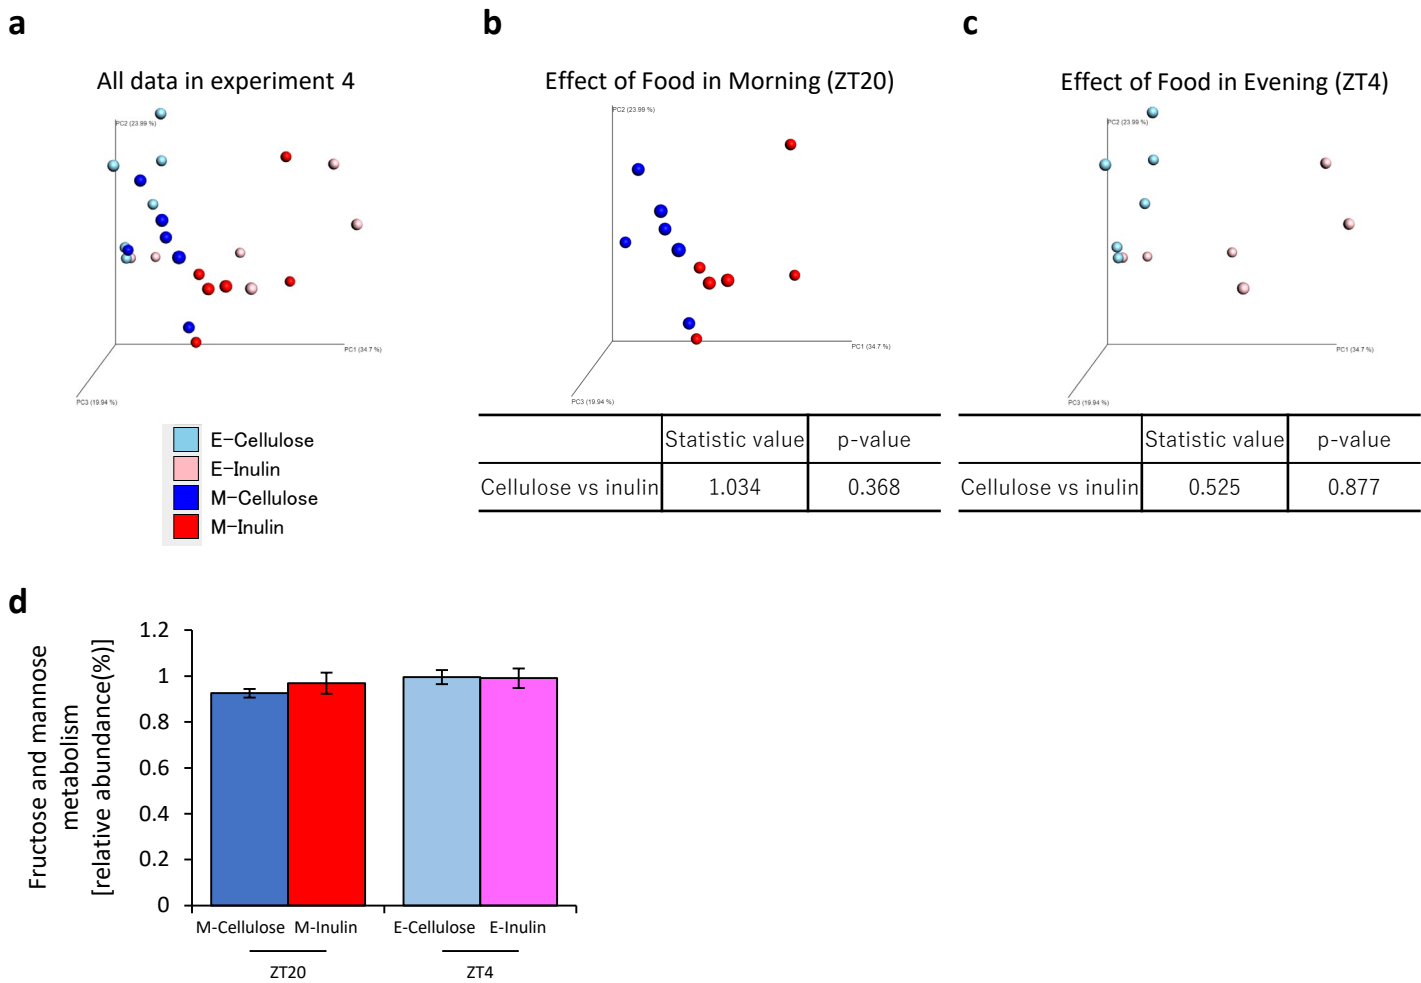

**Figure S5**
